# Supplementary material for: Establishing the accuracy of density functional approaches for the description of noncovalent interactions in ionic liquids
Source: Royal Society of Chemistry journal article supplement (doi:10.1039/d1cp03888e), 2021-01-01
Supplement: d1cp03888e1.pdf [file d1cp03888e1.pdf]

# Establishing the accuracy of density functional approaches for the description of noncovalent interactions in ionic liquids

Minho Kim,<sup>†</sup> Tim Gould,<sup>‡</sup> Ekaterina I. Izgorodina,<sup>¶</sup> Dario Rocca,<sup>†</sup> and Sébastien Lebègue<sup>\*,†</sup>

<sup>†</sup>*Université de Lorraine and CNRS, LPCT, UMR 7019, Vandoeuvre-lès-Nancy 54506, France*

<sup>‡</sup>*Queensland Micro- and Nanotechnology Centre, Griffith University, Nathan, Queensland 4111, Australia*

<sup>¶</sup>*School of Chemistry, Monash University, Clayton, Victoria, Australia*

E-mail: sebastien.lebague@univ-lorraine.fr

# Supplementary Information

## Comparison of calculations using plane-wave and gaussian-type orbital basis set

To conduct a careful comparison between plane-wave basis set and gaussian-type orbital (GTO) basis set data, we further examined how the DFT-PBE energies from plane-wave and GTO basis set calculations can change the vdW-corrected DFT methods by adding the dispersion correction energy to the Gaussian-type PBE energy,

$$\begin{aligned} E_{\text{PBE+vdW}}^{\text{Gaussian}} &= E_{\text{PBE}}^{\text{Gaussian}} + E_{\text{disp}} \\ &= E_{\text{PBE}}^{\text{Gaussian}} + E_{\text{PBE+vdW}}^{\text{plane-wave}} - E_{\text{PBE}}^{\text{plane-wave}} \end{aligned}$$

As shown in Table S1, according to the comparison with plane-wave vdW-corrected PBE energy,  $E_{\text{PBE+vdW}}^{\text{plane-wave}}$ , both MADs from different types of basis sets differ by 0.46 kJ/mol (0.12 % in MAPDs) at most among the tested vdW-corrected DFT methods, proving that it is reliable to compare the plane-wave vdW-corrected DFT energies with the GTO-based calculations.

Table S1: Mean absolute deviation (MAD, kJ/mol) of the vdW-corrected DFT methods based on calculations using plane-wave basis set,  $E_{\text{PBE+vdW}}^{\text{plane-wave}}$ , and Gaussian-type basis set,  $E_{\text{PBE+vdW}}^{\text{Gaussian}} = E_{\text{PBE+vdW}}^{\text{plane-wave}} - E_{\text{PBE}}^{\text{plane-wave}} + E_{\text{PBE}}^{\text{Gaussian}}$ .

| MAD (kJ/mol) | $E_{\text{PBE+vdW}}^{\text{plane-wave}}$ | $E_{\text{PBE+vdW}}^{\text{Gaussian}}$ | $E_{\text{PBE+vdW}}^{\text{plane-wave}}$ | $E_{\text{PBE+vdW}}^{\text{Gaussian}}$ |
|--------------|------------------------------------------|----------------------------------------|------------------------------------------|----------------------------------------|
|              | MAD (kJ/mol)                             |                                        | MAPD (%)                                 |                                        |
| PBE          | 16.71                                    | 16.13                                  | 4.58                                     | 4.42                                   |
| D3(BJ)       | 4.89                                     | 4.67                                   | 1.29                                     | 1.24                                   |
| TS           | 3.59                                     | 3.65                                   | 0.96                                     | 0.98                                   |
| TS/HI        | 4.69                                     | 4.30                                   | 1.26                                     | 1.15                                   |
| TS+SCS       | 3.84                                     | 3.82                                   | 1.03                                     | 1.03                                   |
| MBD@rsSCS    | 4.42                                     | 4.48                                   | 1.17                                     | 1.20                                   |
| MBD@rsSCS/FI | 4.27                                     | 4.35                                   | 1.14                                     | 1.17                                   |
| uMBD         | 4.08                                     | 4.26                                   | 1.09                                     | 1.10                                   |

Table S2: Mean absolute deviation (MAD, kJ/mol), mean signed deviation (MSD, kJ/mol) and mean absolute percentage deviation (MAPD, %) of the tested methods in ionic liquid benchmark set.

|                                   | MAD (kJ/mol) | MSD (kJ/mol) | MAPD (%) |
|-----------------------------------|--------------|--------------|----------|
| PBE and vdW-correction methods    |              |              |          |
| PBE                               | 16.71        | +16.70       | 4.58     |
| D3(BJ)                            | 4.89         | +0.95        | 1.29     |
| TS                                | 3.59         | +1.20        | 0.96     |
| TS/HI                             | 4.69         | +3.20        | 1.26     |
| TS+SCS                            | 3.84         | +2.04        | 1.03     |
| MBD@rsSCS                         | 4.42         | -0.50        | 1.17     |
| MBD@rsSCS/FI                      | 4.27         | -0.25        | 1.14     |
| uMBD                              | 4.08         | -2.03        | 1.09     |
| Nonlocal vdW functionals          |              |              |          |
| vdW-DF2                           | 3.82         | +3.48        | 1.01     |
| rev-vdW-DF2                       | 2.92         | +0.40        | 0.77     |
| vdW-DF-cx                         | 3.03         | +0.29        | 0.80     |
| SCAN+rVV10                        | 3.67         | -3.28        | 0.98     |
| Range-separated hybrid functional |              |              |          |
| $\omega$ B97X-V                   | 2.07         | +0.96        | 0.56     |

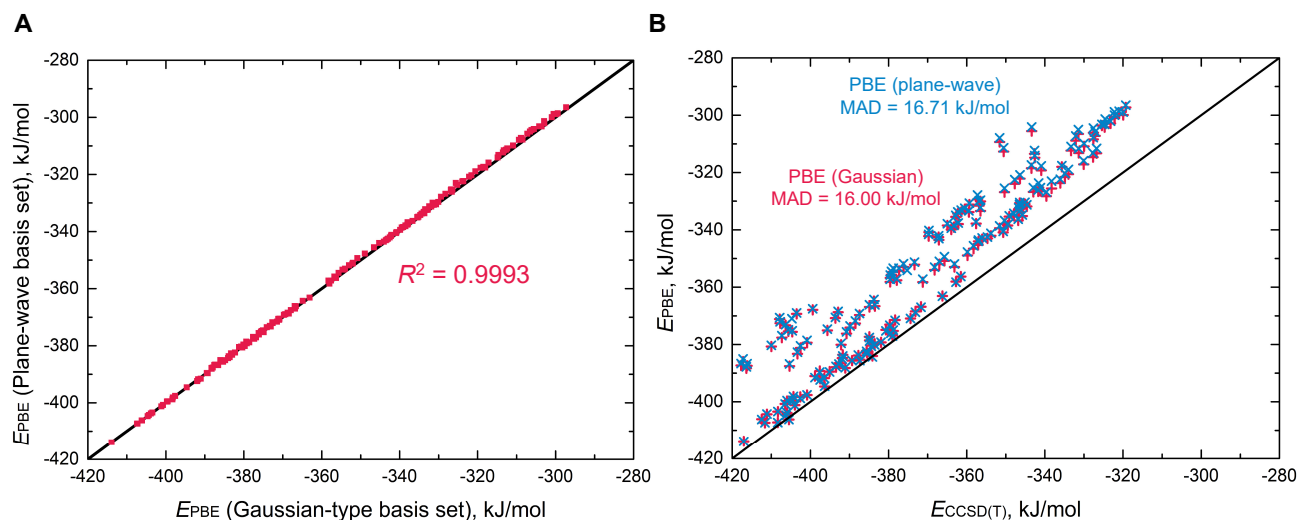

Figure S1: **A** PBE interaction energy of ionic liquid pairs in the IL174 benchmark set by using Gaussian-type basis set in Gaussian09 ( $x$ -axis) and plane-wave basis set in VASP ( $y$ -axis) in kJ/mol. **B** CCSD(T) ( $x$ -axis) and PBE ( $y$ -axis) interaction energies of ionic liquid pairs by using Gaussian-type basis set (red) and plane-wave basis set (blue) in kJ/mol.

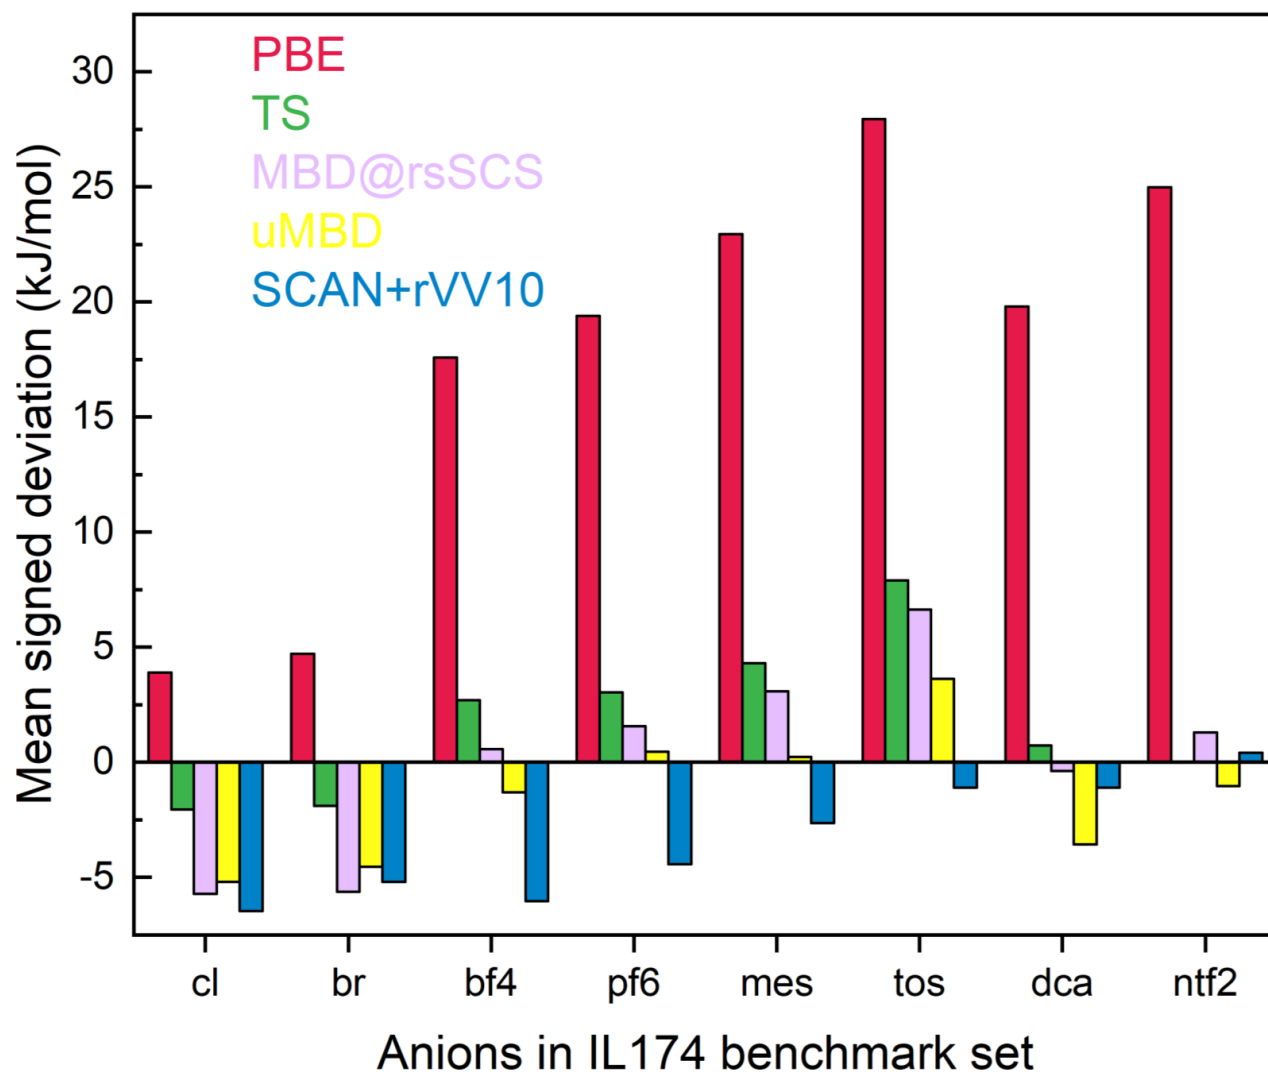

Figure S2: Mean signed deviations (MSDs, in kJ/mol) of PBE and some van der Waals approaches tested for the ionic liquid pairs in the IL174 benchmark set as grouped by the type of their anions.
